# Supplementary material for: Loss of epithelium-specific GPx2 results in aberrant cell fate decisions during intestinal differentiation
Source: PubMed Central journal article supplement (PMC5787487; doi:10.18632/oncotarget.22640), 2017-11-23
Supplement: oncotarget-09-539-s001.pdf [file oncotarget-09-539-s001.pdf]

## Loss of epithelium-specific GPx2 results in aberrant cell fate decisions during intestinal differentiation

### SUPPLEMENTARY MATERIALS

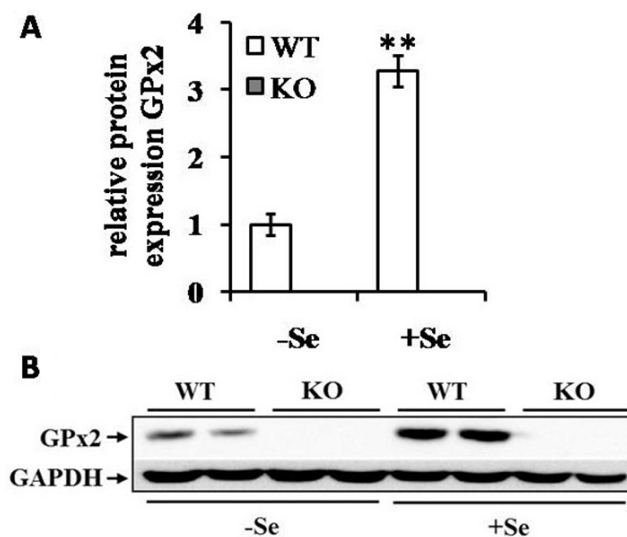

**Supplementary Figure 1: Confirmation of the GPx2 KO by western blot analysis.** (A) Colon tissue lysates of four mice/group were analyzed for GPx2 protein abundance by Western blot, quantified by densitometry, normalized to the expression of GAPDH and expressed in relation to the -SeWT group. \*\* $p < 0.01$ , student's  $t$ -test. (B) Representative Western blots of two animals/group.

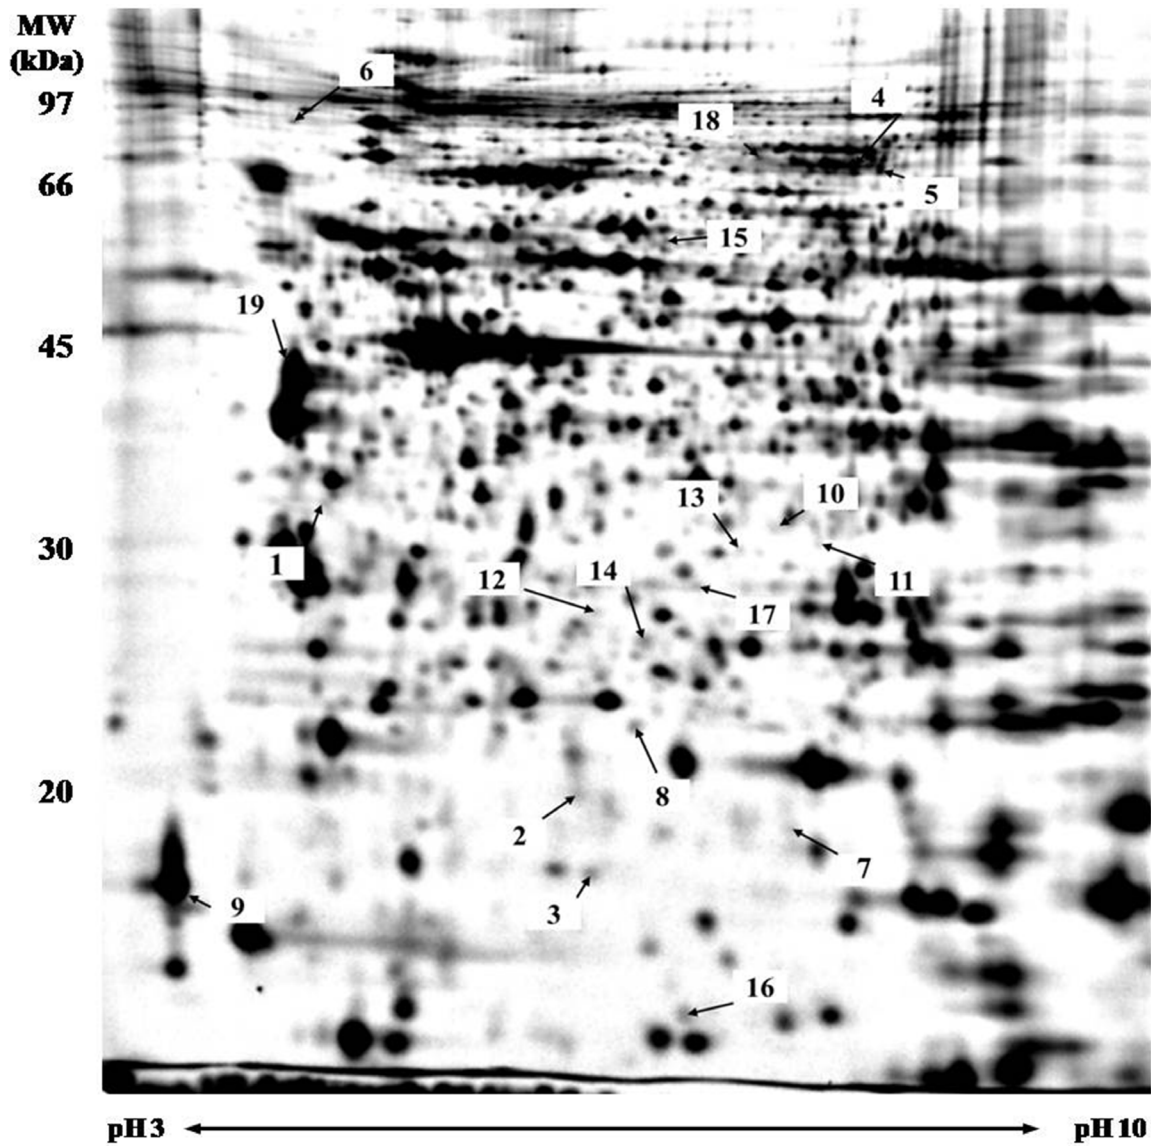

**Supplementary Figure 2: GPx2 KO influenced the protein expression pattern of murine colon tissues.** Representative proteome profile of colon tissues (sample + Se WT) generated as described in the Materials and Methods section. Significant differentially expressed and identified proteins are indicated with numbers ( $p < 0.05$ ; see also Table 1).

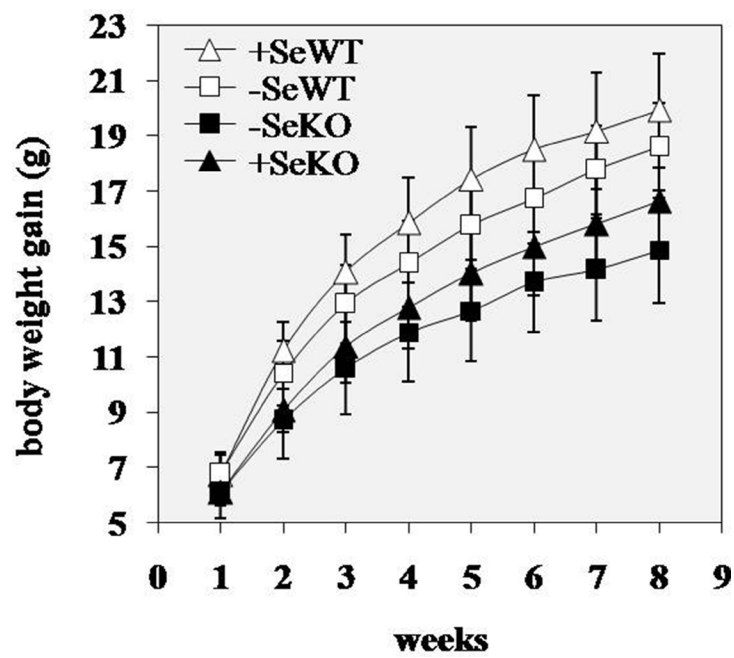

**Supplementary Figure 3: GPx2 knockout mice exhibit decreased weight gain.** Weights of the mice were recorded weekly and the cumulative weight gain (g) was calculated across the eight-week feeding period.

**Supplementary Table 1: Real-time PCR primer pairs applied in this study**

| gene       |         | primer sequence (5'→3')  | gene bank accession No. | product size (bp) |
|------------|---------|--------------------------|-------------------------|-------------------|
| Atoh1      | forward | AGAAGCTGTCCAAATATGAGACCC | NM_007500.4             | 141               |
|            | reverse | GTGCGAAGGTGATGGTGGTC     |                         |                   |
| Cbfa2t3    | forward | TCTGAGGAGGGGAAGAAGGG     | NM_177289.1             | 356               |
|            | reverse | CAGTTCAGCAGCTCTCGC       |                         |                   |
| Chga       | forward | TACCCAATCACCAACCAGCC     | NM_007693.2             | 249               |
|            | reverse | GAGTCCGACTGACCATCATCT    |                         |                   |
| Clca1      | forward | GATAACGGAGCAGGTGCCG      | NM_017474.2             | 486               |
|            | reverse | TGAGGTGTTGAAGTGGTCCC     |                         |                   |
| Clca2      | forward | GTCACCAGGTGTTTCATCTGAC   | NM_178697.5             | 257               |
|            | reverse | ACGTCCCAAGTGCTTCTGAG     |                         |                   |
| Clca3a1    | forward | GACCCCGAGGCAGAGTCTTT     | NM_009899.4             | 150               |
|            | reverse | CCACATTGGTGCCAGTGATCC    |                         |                   |
| Clca4a     | forward | CAACAAGGTGCTCCACAGG      | NM_207208.3             | 343               |
|            | reverse | GAGAAGAAGGGTGGAGAGGG     |                         |                   |
| Ghrl       | forward | CCAGAGGACAGAGGACAAGC     | NM_021488.5             | 170               |
|            | reverse | GCTGGCGCCTCTTTGACC       |                         |                   |
| Glp-1      | forward | TGTCTACACCTGTTTCGCAGC    | NM_008100.4             | 151               |
|            | reverse | AAGCTGGGAATGATCTGGGG     |                         |                   |
| Hes1       | forward | AACACGACACCGGACAAACCA    | NM_008233.2             | 150               |
|            | reverse | GCCGGGAGCTATCTTTCTAAAGT  |                         |                   |
| Lgr5       | forward | AAGTTCAAGATGAGCGGGACCT   | NM_010195.2             | 142               |
|            | reverse | GATTCGGATCAGCCAGCTACCA   |                         |                   |
| Lysozym    | forward | TTCGAGCATGGGTGGCATGG     | NM_013590.3             | 100               |
|            | reverse | GGCTGCAGTAGAAGCACACC     |                         |                   |
| Muc2       | forward | ACTGTTTTGGGTCCGTGGG      | NM_023566.3             | 241               |
|            | reverse | AGAAAACGGGGGCTAGAACG     |                         |                   |
| Pax4       | forward | CTGCTCCTGAGTGAAGGCTC     | NM_011038.2             | 277               |
|            | reverse | TCACACTGCTGAGTCCGTCC     |                         |                   |
| Rapgef3    | forward | CTGCTGCTCAAAGACGTGACC    | NM_001177810.1          | 393               |
|            | reverse | CCTCTGGACCTCTTGGTTGC     |                         |                   |
| Spdef      | forward | ACATCTGGAAGTCAGCGGC      | NM_013891.4             | 319               |
|            | reverse | TAATACTGGCGGATGGAGCG     |                         |                   |
| Sst        | forward | TGCCACGGGAAACAGGAAC      | NM_009215.1             | 322               |
|            | reverse | GTCAAGTTGAGCATCGGGGG     |                         |                   |
| Tph1       | forward | TACACTCCAGAGCCAGACACC    | NM_009414.3             | 415               |
|            | reverse | TGTACTTCAGTCCAAACGGGC    |                         |                   |
| beta-actin | forward | ACTGTCGAGTCGCGTCC        | NM_007393.5             | 487               |
|            | reverse | ATGGCTACGTACATGGCTGG     |                         |                   |
| Gapdh      | forward | TTGTGCAGTGCCAGCCTCGT     | NM_008084.3             | 214               |
|            | reverse | TCGGCCTTACTGTGCCGTT      |                         |                   |
| Rpl13a     | forward | GACCTCCTCCTTCCCAGG       | NM_009438.5             | 148               |
|            | reverse | TTCACAGCGTACGACCACC      |                         |                   |
